# Supplementary material
Source: MDPI journal article supplement (https://www.mdpi.com/1424-2818/16/2/113)
Supplement: s1 [file s1]

# Supplementary Data

**Table S1: The Statistics of the partitions from the data that was used for the tree.**

|                                  | <i>rbcLa</i> | <i>matK</i> | 26s     | Combined  |
|----------------------------------|--------------|-------------|---------|-----------|
| Sequence coverage                | 76           | 57          | 33      | 76        |
| Number of characters             | 545          | 659         | 882     | 2086      |
| Number of unique characters      | 93           | 231         | 116     | 440       |
| Number of informative characters | 56 (10%)     | 140 (21%)   | 72 (8%) | 266 (13%) |
| Number of constant characters    | 466          | 418         | 766     | 1643      |
| Consistency index (CI)           | 0,607        | 0,789       | 0,576   | 0,668     |
| Retention index (RI)             | 0,865        | 0,894       | 0,654   | 0,823     |
| Number of trees                  | 79           | 2346        | 324     | 503       |
| Tree length                      | 163          | 383         | 273     | 837       |

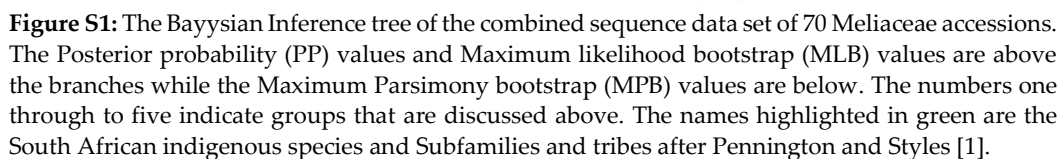

**Figure S1:** The Bayesian Inference tree of the combined sequence data set of 70 Meliaceae accessions. The Posterior probability (PP) values and Maximum likelihood bootstrap (MLB) values are above the branches while the Maximum Parsimony bootstrap (MPB) values are below. The numbers one through to five indicate groups that are discussed above. The names highlighted in green are the South African indigenous species and Subfamilies and tribes after Pennington and Styles [1].
